# Supplementary material for: Antiangiogenesis, Loss of Cell Adhesion and Apoptosis Are Involved in the Antitumoral Activity of Proteases from V. cundinamarcensis (C. candamarcensis) in Murine Melanoma B16F1
Source: PubMed Central journal article supplement (PMC4425002; doi:10.3390/ijms16047027), 2015-03-27
Supplement: ijms-16-07027-s001.pdf [file ijms-16-07027-s001.pdf]

## Supplementary Information

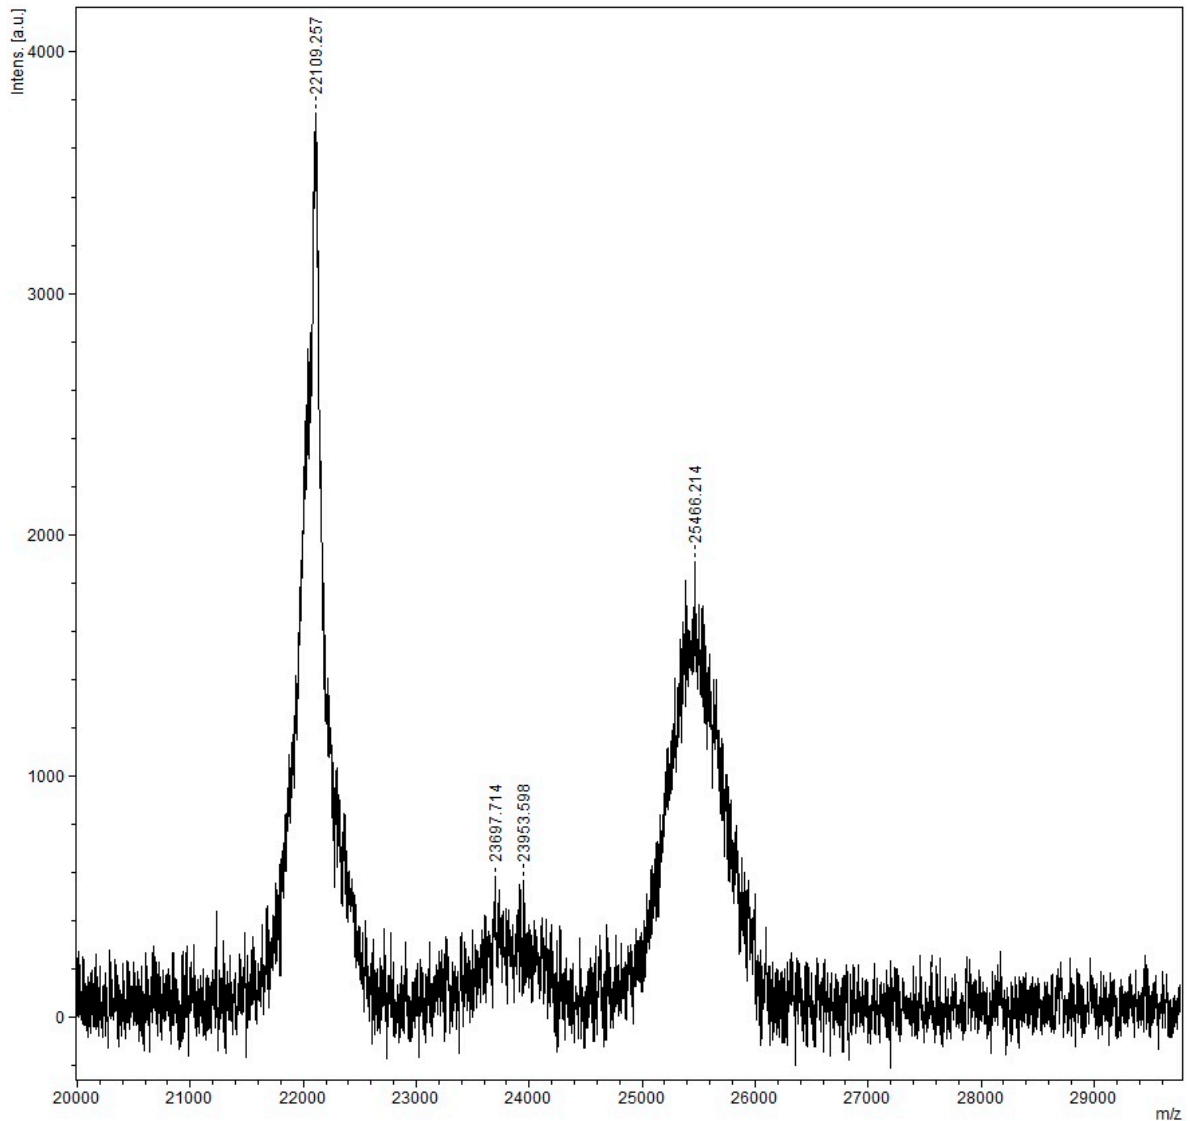

**Figure S1.** Mass spectrometric analysis of P1G10. The proteolytic fraction was desalted by passage on C4 HPLC column (Vidac). The absorbing fraction from HPLC was mixed with  $\alpha$ -cyano-4-hydroxy-cinnamic acid (matrix) dissolved in 0.1 g/100 mL trifluoroacetic acid and processed in a UltrafleXtrem MALDI-TOF mass spectrometer (Bruker Daltonics, Leipzig, Germany).
